# Supplementary material
Source: HighWire-hosted journal article supplement (https://cmaj.ca/highwire/filestream/69050/field_highwire_adjunct_files/1/170595-res-2-at.pdf)

**Appendix 2 (as supplied by the authors):** Stratification on the main model analyzing the risk that a daughter had an induced abortion (IA) as a teenager, among those whose mother had an IA between -4 and +12 years of daughter's birth date, relative to daughters whose mother did not have an IA (the referent)

The cohort comprises daughters born between 1992 and 1999. Shown in the blue italicized heading is the number of teenage daughters who had an IA between age 12 to 19 years divided by the total number of teenage daughters aged 12-19 years, and the corresponding incidence rate in parentheses. Hazard ratios were adjusted for mother's age at the birth of the daughter, mother's world region of origin, daughter's mental health status in the 2-year period before turning age 12 years, any major physical health problem in the daughter in the 2-year period before turning age 12 years, neighborhood-level rate of teen IA, mother and daughter cohabitation when the daughter was aged 12 years, daughter's rural/urban residence at the time of her birth and at age 12 years, and daughter's neighborhood income quintile at the time of her birth and at age 12 years.

*No. with teen IA / No. at risk  
(incidence rate per 1000 person-years)*

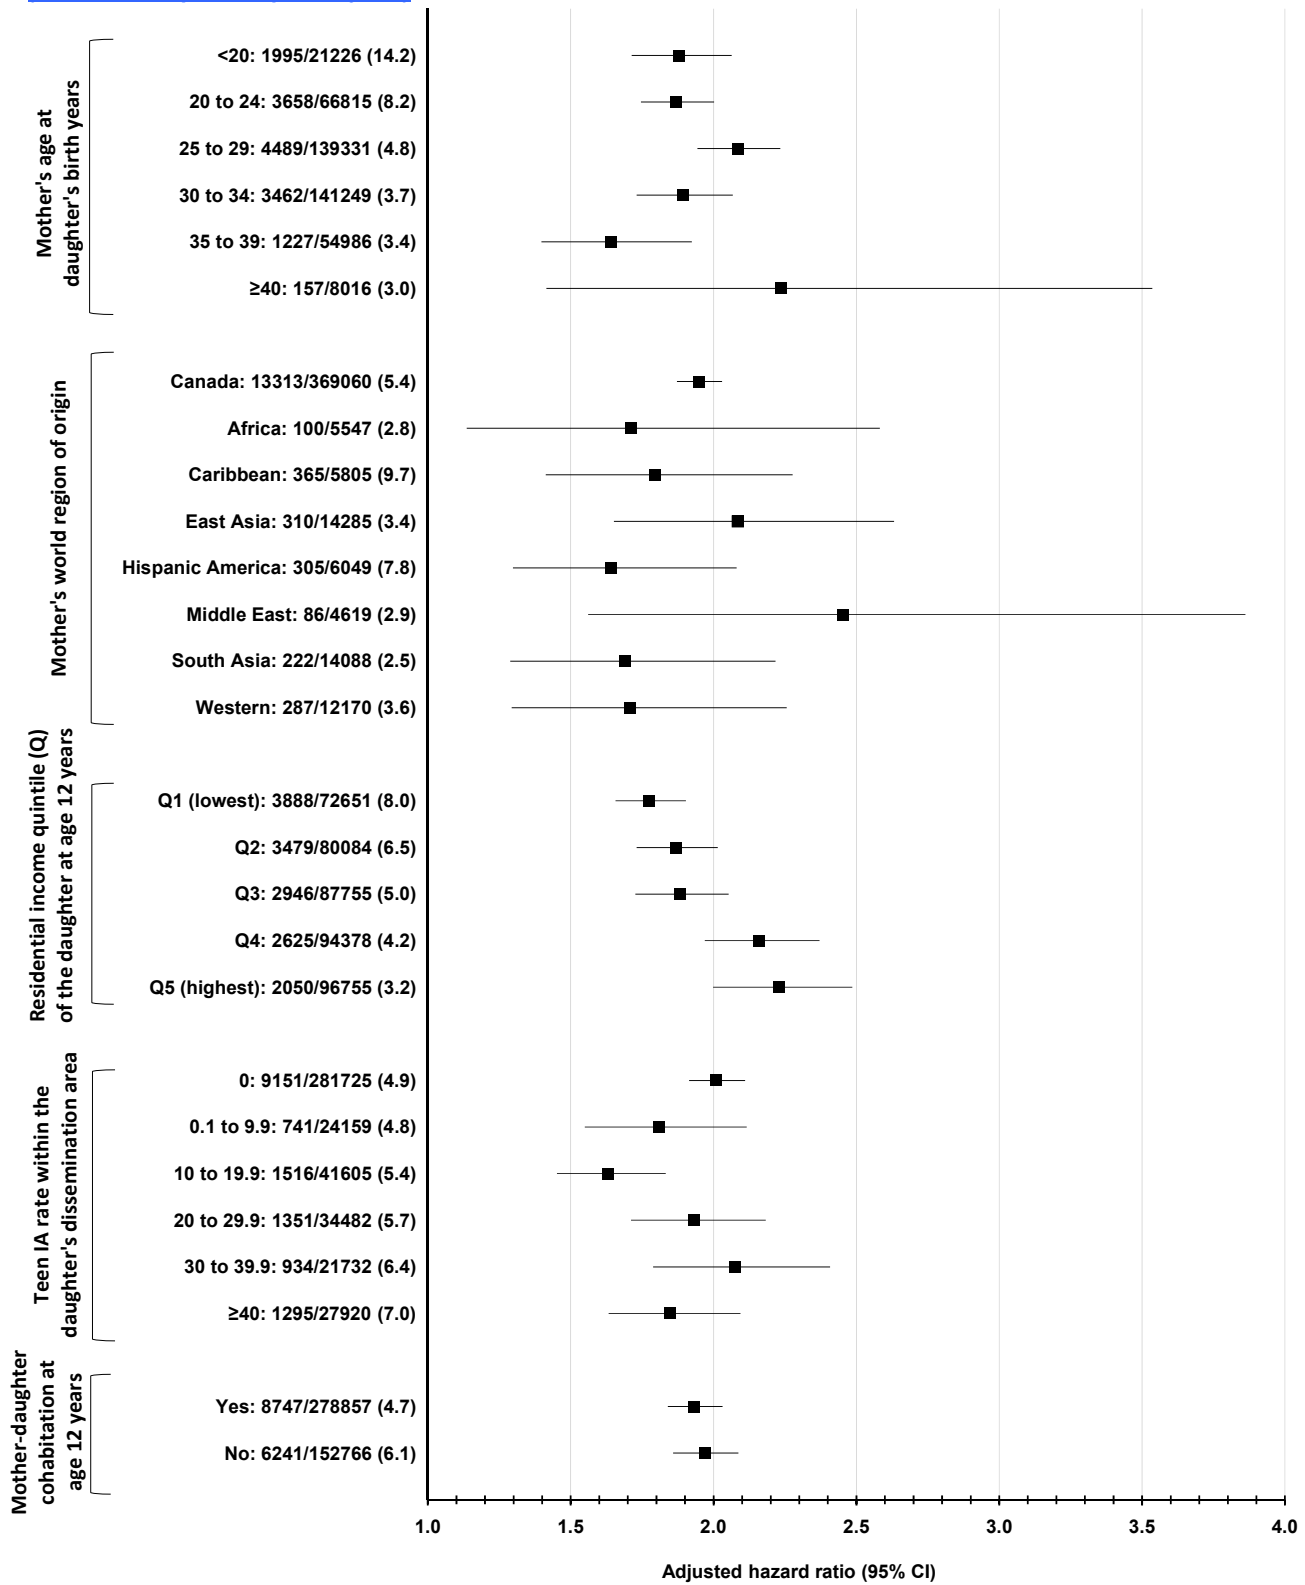

Supplement: 170595-res-2-at.pdf [file 170595-res-2-at.pdf]
